24 School of Computer Science

25 Carnegie Mellon University

26 5000 Forbes Avenue

27 Pittsburgh, PA, USA 15213

28 Phone: 412-268-1866

29 Fax: 412-268-2977

30 Email: [weiwu2@cs.cmu.edu](mailto:weiwu2@cs.cmu.edu)

31

## 1 **Abstract**

2 Opioids are widely used for treating different types of pains, but overuse and abuse  
3 of prescription opioids have led to opioid epidemic in the United States. Besides  
4 analgesic effects, chronic use of opioid can also cause tolerance, dependence,  
5 and even addiction. Effective treatment of opioid addiction remains a big challenge  
6 today. Studies on addictive effects of opioids focus on striatum, a main component  
7 in the brain responsible for drug dependence and addiction. Some transcription  
8 regulators have been associated with opioid addiction, but relationship between  
9 analgesic effects of opioids and dependence behaviors mediated by them at the  
10 molecular level has not been thoroughly investigated. In this paper, we developed  
11 a new computational strategy that identifies novel targets and potential therapeutic  
12 molecular compounds for opioid dependence and addiction. We employed several  
13 statistical and machine learning techniques and identified differentially expressed  
14 genes over time which were associated with dependence-related behaviors after  
15 exposure to either morphine or heroin, as well as potential transcription regulators  
16 that regulate these genes, using time course gene expression data from mouse  
17 striatum. Moreover, our findings revealed that some of these dependence-  
18 associated genes and transcription regulators are known to play key roles in  
19 opioid-mediated analgesia and tolerance, suggesting that an intricate relationship  
20 between opioid-induced pain-related pathways and dependence may develop at an  
21 early stage during opioid exposure. Finally, we determined small compounds that  
22 can potentially target the dependence-associated genes and transcription

23 regulators. These compounds may facilitate development of effective therapy for  
24 opioid dependence and addiction. We also built a database (<http://daportals.org>)  
25 for all opioid-induced dependence-associated genes and transcription regulators  
26 that we discovered, as well as the small compounds that target those genes and  
27 transcription regulators.

28

## 29 **Author summary**

30 Opioids are widely used to treat pain in the clinics, however, overuse and abuse  
31 of prescription opioids in the United States cause opioid epidemic. There are no  
32 effective treatments for opioid addiction. Researchers have some understanding  
33 of the mechanism of opioid addiction at the molecular level, in relation to its pain-  
34 relieving effect in the brain, but there are still many issues to be addressed. We  
35 developed a computational strategy in an effort to find novel target genes and  
36 effective therapeutic treatment of opioid dependence and addiction. Using  
37 statistical and machine learning methods, we identified genes and transcription  
38 regulators that can serve as potential targets for treating opioid dependence and  
39 addiction. Our results revealed both known and novel genes and transcription  
40 regulators that were associated to dependence-related behavioral changes after  
41 opioid administration. Moreover, we found that many behavioral changes after  
42 opioid addiction are related to opioid effects on pain relief as well as immune and  
43 neuronal signaling. Following our analysis, we further determined small  
44 compounds that can potentially target dependence-associated genes and

45 transcription regulators. We also built a database for the genes, transcription  
46 regulators, and small compounds, which is available at <http://daportals.org>.

47

## 48 **Introduction**

49 Opioids such as morphine have long been used as mainstay therapy for treating  
50 different types of chronic severe pains such as cancer pain, noncancer-related  
51 pain, and neuropathic pain [1]. As a result of relaxation on restriction of prescription  
52 opioids for treating chronic noncancer pain and promotion of opioids in treatment  
53 by pharmaceutical industry, practitioners and many organizations, non-medical  
54 use and abuse of prescription opioids has been increasing rapidly in the United  
55 States [2], which in turn leads to opioid epidemic [3].

56

57 Despite that opioids have beneficial analgesic effects of alleviating acute and  
58 chronic pain, chronic opioid use can lead to adverse side effects including  
59 tolerance, hyperalgesia, withdrawal reactions, and even dependence [2, 4, 5]. In  
60 order to achieve optimal pain management, many studies have been carried out  
61 to elucidate mechanisms underlying both the beneficial as well as the adverse  
62 effects of opioids. Plenty of evidence has shown that crosstalks between neuronal  
63 signaling, immune responses and chemokines play significant roles in the pain  
64 pathways responsive to opioids such as morphine, and these signaling networks  
65 can lead to both behavioral and structural changes in the brain [6, 7].

66

67 Studies on effects of opioids to relieve pain mainly focus on brain regions such as  
68 periaqueductal gray, rostral ventromedial medulla, and dorsal root ganglia [6],  
69 while investigations of addictive effects of opioids mostly focus on striatum, since  
70 striatum is a main component of the reward system responsible for drug  
71 dependence and addiction. Striatum receives several types of neuronal inputs from  
72 prefrontal cortex (PFC), ventral tegmental area (VTA), and other areas of the brain  
73 [8], and over time, drug dependence and addiction can be reinforced [9]. At the  
74 molecular level, many transcription factors (TFs) have been associated with  
75 behaviors related to drug abuse and addiction. Some TFs known to play key roles  
76 in drug addiction include  $\Delta$ FosB, cyclic AMP-responsive element binding protein  
77 (CREB), NF- $\kappa$ B, and MEF2 [7]. For instance, opioids can reduce Fos expression  
78 in the direct pathway striatal neurons [10]. Moreover, drugs of abuse can also alter  
79 gene transcription and induce addiction by epigenetic mechanisms [7].

80

81 Despite that different drugs of abuse often elicit similar behavioral responses in  
82 animals and humans, molecular mechanisms underlying addiction induced by  
83 different drugs can be distinctly different [10]. Opioids such as morphine and heroin  
84 increase dopamine level in nucleus accumbens, the main component of the ventral  
85 striatum, through activation of dopaminergic neurons in VTA [10]. It is popularly  
86 believed opioids inhibition of GABAergic neurons in VTA is another contributing  
87 factor of disinhibition of dopamine in VTA and increased rewarding effects in  
88 nucleus accumbens [11-16]. Opioids can also increase glutamate release in the

89 nucleus accumbens, which results in changes in synaptic plasticity such as  
90 decreased dendritic branching and spine density [17].

91

92 Despite all these efforts, however, much remains to be known about molecular  
93 connections between the genes and pathways activated by opioids in the pain-  
94 related processes and those involved in opioid dependence and addiction.  
95 Elucidating such connections can not only shed light on the mechanisms which  
96 contribute to the opioid epidemic, but may also allow people to identify better  
97 candidate targets for therapeutic interventions to prevent opioid dependence and  
98 addiction during pain management.

99

100 In order to treat opioid addiction, opioid antagonists such as naltrexone have been  
101 used to treat opioid addiction for several decades. However, they have shown  
102 limited efficacy in relapse prevention [18, 19]. Recently, alternative approaches  
103 such as receptor-based therapeutic strategies have been proposed which aim to  
104 target receptors including G protein-coupled receptors (GPCRs) such as  $\mu$ -,  $\delta$ -,  
105 and  $\kappa$ -opioid receptors, chemokine receptors, as well as neuroimmune receptors  
106 such as Toll-like receptors 4 (TLR4) [20-22]. However, despite all the efforts and  
107 advances in understanding the mechanism of addiction in the past decades, they  
108 have not led to development of effective new anti-addiction agents [23]. Therefore,  
109 finding novel targets and strategies is needed for treating opioid dependence and  
110 addiction.

111

112 In this work, we developed a new computational strategy for identification of novel  
113 genome-wide targets and potential therapeutic treatments for opioid dependence.  
114 In particular, this strategy involves first detecting genes and pathways induced by  
115 either morphine or heroin which are associated with dependence, then  
116 identification of small compounds which can target the dependence-associated  
117 genes responsive to the opioids. Using this strategy, we identified morphine and  
118 heroin-induced genes and pathways associated with dependence-related  
119 behaviors such as physical dependence and psychological dependence, as well  
120 as transcription regulators which can potentially regulate these genes. Finally, we  
121 identified small compounds which can potentially target some of the dependence-  
122 related genes and transcription factors. A database for all the dependence  
123 associated genes and transcription regulators, along with small compounds for  
124 targeting those genes and transcription regulators, is available at  
125 <http://daportals.org>. Our findings can facilitate identification of novel candidate  
126 gene targets as well as potential therapeutic interventions for treating opioid  
127 dependence and addiction.

128

## 129 **Results**

### 130 **Identification of genes and patterns induced by either morphine or heroin**

131 In order to identify genes induced by either morphine or heroin over time, we  
132 applied a local regression method to gene expression microarray data collected  
133 from mice treated by each opioid at different time points [24]. Using this approach,



134 we found that 423 genes were differentially expressed (DE) after morphine  
135 administration in mice, while 608 genes were differentially induced by heroin.  
136 Using *k*-means clustering, we identified 6 expression patterns among genes  
137 induced by each opioid (Figs 1 and 2), with genes upregulated and downregulated  
138 at 3 phases: Immediate-Early (IE), Middle (M), and Late (L), respectively.  
139 Compared to morphine, heroin induced twice as many genes in the IE and L  
140 phases, respectively (Figs 1 and 2), indicating that heroin elicits neurobiological  
141 responses in mice not only faster but also longer lasting than morphine.

142

143 **Fig 1: Genes differentially expressed after morphine exposure in mouse**  
144 **striatum.** (A) Patterns of differentially expressed genes induced by morphine. (B-  
145 C) These plots show six genes upregulated (B) and downregulated (C) by  
146 morphine in the IE, M, and L phase, respectively.

147

148 **Fig 2: Genes differentially expressed after heroin exposure in mouse**  
149 **striatum.** (A) Patterns of differentially expressed genes induced by heroin. (B-C)  
150 These plots show six genes upregulated (B) and downregulated (C) by heroin in  
151 the IE, M, and L phase, respectively.

152

153 **Enriched Gene Oncology (GO) and KEGG terms among differentially**  
154 **expressed genes (DEGs)**

155 Our GO and KEGG analyses revealed that many DEGs induced by either  
156 morphine or heroin in the mouse striatum were involved in the immune and

157 neuronal processes and pathways (Tables 1 and 2, S1 and S2 Tables). Many of  
 158 these biological processes are previously known to play important roles in opioid-  
 159 mediated pain pathways in brain regions such as dorsal root ganglia [6]. However,  
 160 despite that the neuroimmune signaling processes induced by either morphine or  
 161 heroin in mouse striatum share some similarities, it is also apparent that the two  
 162 opioids elicit distinct neurobiological responses in the animals which we will detail  
 163 below:

164

165 **Table 1: Significantly enriched biological processes and pathways induced**  
 166 **by morphine which were involved in opioid-mediated pain pathways and**  
 167 **corresponding literature support.** In the “Phase” column, Up-IE, Up-M, and  
 168 Up-L represent upregulated in the IE, M, and L phase, respectively, while that  
 169 Down-IE, Down-M, and Down-L represent downregulated in the IE, M, and L  
 170 phase, respectively. Note: the full names of the behaviors can be found in S3  
 171 Table. HM\* indicates that the DEG is induced by both heroin and morphine.

172

|               | GO/KEGG term                                   | Phase  | Effect (Literature support)                                   | DEGs Associated with Dependence and Other Harmful Effects |
|---------------|------------------------------------------------|--------|---------------------------------------------------------------|-----------------------------------------------------------|
| Immune system | Pattern recognition receptor signaling pathway | Up-M   | Proinflammatory responses, tolerance [6, 22]                  | Irak1: phys dep; Ptafr: phys dep.                         |
|               | Activation of innate immune response           |        | Proinflammatory responses, tolerance [6, 22]                  | Irak1: phys dep; Ptafr: phys dep.                         |
|               | Toll-like receptor signaling pathway           |        | Allodynia and hyperalgesia [25, 26]; NF-κB activation [27-29] | Irak1: phys dep.                                          |
|               | Response to xenobiotic stimulus                | Up-L   | Tolerance [30, 31]                                            |                                                           |
|               | Negative regulation of NF-κB TF activity       |        | Analgesia<br>NF-κB activation [6]                             |                                                           |
|               | MAPK signaling pathway                         | Down-M | Anti-inflammatory responses<br>Analgesia [32]                 |                                                           |

|                    |                                                 |         |                                                        |                                                                        |
|--------------------|-------------------------------------------------|---------|--------------------------------------------------------|------------------------------------------------------------------------|
|                    | Humoral immune response                         |         |                                                        |                                                                        |
|                    | Induction of positive chemotaxis                | Down-L  | Nociceptive pathways [22]                              |                                                                        |
| Neuronal signaling | Cell projection morphogenesis                   | Up-L    | Structural plasticity [33]                             | Numb: acute, dep, HCC, phys dep, phys harm                             |
|                    | Calcium signaling pathway                       | Down-IE | Analgesia [22]                                         |                                                                        |
|                    | Synaptic transmission, glutamatergic            | Down-M  | Analgesia [34-36]                                      | Grin1: phys dep, pleasure                                              |
|                    | Ensheathment of neurons                         |         | Nociceptive pathways [22]                              | Cldn5 (HM*): phys dep.                                                 |
|                    | Synaptic transmission, GABAergic                |         | Proinflammatory; tolerance [6, 37]                     |                                                                        |
|                    | Glutamate receptor signaling pathway            |         | Analgesia [6]                                          | Cacng7: dep, phys dep, pleasure                                        |
|                    | Sensory organ development                       |         | Analgesia [38, 39]                                     | Anp32b: phys dep.                                                      |
|                    | Negative regulation of neuron apoptotic process |         | Neuronal apoptosis [6]                                 | Grin1: phys dep, pleasure                                              |
| Other key pathways | Protein dephosphorylation                       | Up-IE   | Alleviating inflammatory hyperalgesia [6, 40]          | Dusp12 (HM): phys dep.                                                 |
|                    | positive regulation of autophagy                |         | Production of proinflammatory cytokines, tolerance [6] | Plekhf1: psycho dep.                                                   |
|                    | Regulation of programmed cell death             |         | Production of proinflammatory cytokines, tolerance [6] | Dapk1 (HM): psycho dep; Plekhf1 (HM): psycho dep; Pim3 (HM): phys dep. |

173

174

175 **Table 2: Significantly enriched biological processes and pathways induced**  
 176 **by heroin which were involved in opioid-mediated pain pathways and**  
 177 **corresponding literature support.** All of the abbreviations used in this table can  
 178 be found in the legend of Table 1.

179

|               | GO/KEGG term                                         | Phase  | Effect (Literature support)                  | DEGs Associated with Dependence and Other Harmful Effects              |
|---------------|------------------------------------------------------|--------|----------------------------------------------|------------------------------------------------------------------------|
| Immune system | Response to biotic stimulus                          | Up-IE  | Nociceptive pathways [6]                     | Ace: dep, phys dep; Baiap2: pleasure, psycho dep; Stab1 (HM): phys dep |
|               | MyD88-dependent toll-like receptor signaling pathway | Down-L | Anti-inflammatory effect; analgesia [30, 41] |                                                                        |

|                     |                                                          |         |                                                      |                                                             |                                            |
|---------------------|----------------------------------------------------------|---------|------------------------------------------------------|-------------------------------------------------------------|--------------------------------------------|
|                     | T-helper 1 type immune response (Il4, Tlr6, Il27)        |         |                                                      |                                                             |                                            |
|                     | Positive regulation of I-κB kinase/NF-κB signaling       |         |                                                      |                                                             |                                            |
|                     | Inflammatory response                                    |         |                                                      |                                                             |                                            |
|                     | Regulation of MAP kinase activity                        |         |                                                      |                                                             |                                            |
|                     | Microglial cell activation                               |         |                                                      |                                                             | Anti-inflammatory responses; analgesia [6] |
|                     | Regulation of granulocyte chemotaxis                     |         |                                                      |                                                             | Nociceptive pathways [22]                  |
| Neuronal signaling  | Cell morphogenesis involved in neuron differentiation    | Up-IE   | Nociceptive pathways [22]                            | Baiap2: pleasure, psycho dep                                |                                            |
|                     | Regulation of nervous system development                 |         | Nociceptive pathways [22]                            | Ace: dep, phys dep; Ncs1: dep; Baiap2: pleasure, psycho dep |                                            |
|                     | Regulation of excitatory postsynaptic membrane potential |         | Tolerance and hyperalgesia [22]                      | Sez6: dep                                                   |                                            |
|                     | Potassium ion transport                                  | Up-M    | Proanalgesic effect [22]                             |                                                             |                                            |
|                     | Cation transmembrane transport                           |         | Tolerance and hyperalgesia [32]                      | Slc25a42: dep                                               |                                            |
|                     | Sodium ion transmembrane transport                       | Up-L    | Allodynia and hyperalgesia [22]                      |                                                             |                                            |
|                     | Regulation of synapse organization                       |         | Analgesia [22]                                       |                                                             |                                            |
|                     | Regulation of neuron death                               | Down-IE | Linked to anti-inflammatory response; analgesia [42] | Bag1: dep, pleasure; Tfap2d: dep, pleasure, psycho dep      |                                            |
| Other key processes | Protein autophosphorylation                              | Up-IE   | Hyperalgesia [22]                                    | Dapk1 (HM): psycho dep; Pim3 (HM): phys dep                 |                                            |
|                     | Negative regulation of receptor recycling                | Up-L    | Tolerance [22]                                       | Pcsk9: pleasure, psycho dep                                 |                                            |
|                     | Response to cAMP                                         | Down-M  | Analgesia [6]                                        |                                                             |                                            |

180

## 181 **Immune and neuronal responses to morphine in mouse striatum**

182 **Immune responses:** Most genes involved in the immune system were induced by  
 183 morphine in the M phase. As shown in Table 1, some genes participating in anti-  
 184 inflammatory processes were responsive to morphine, e.g., genes involved in  
 185 negative regulation of NF-κB transcription factor activity were upregulated, and  
 186 those involved in MAPK pathway, humoral immune response, and induction of

187 positive chemotaxis were downregulated. Since anti-inflammatory pathways are  
188 known to play key roles in opioid-induced pain relief [6], these results are  
189 consistent with the fact that morphine induces analgesia effect in animals.

190

191 On the other hand, some genes participating in proinflammatory responses were  
192 also upregulated by morphine, including, e.g., genes involved in Toll-like receptor  
193 signaling pathway, and activation of innate immune response. Notably, previous  
194 evidence showed that proinflammatory responses play central roles which  
195 contribute to tolerance during chronic opioid exposure [7]. Genes involved in  
196 response to xenobiotic stimulus were also upregulated in the L phase, in line with  
197 the fact that these genes are essential in sensing that the cells are under the ‘insult’  
198 of the drug.

199

200 Together, these results suggest that crosstalks between genes involved in  
201 proinflammatory and anti-inflammatory pathways have already initiated in mouse  
202 striatum during short-term morphine administration.

203

204 **Neuronal responses:** Our results also showed that genes participating in  
205 neuronal responses were induced by morphine (Table 1), which is not surprising,  
206 given known neurological effects of morphine in the brain. For example, positive  
207 regulation of autophagy and programmed cell death were upregulated in the IE  
208 phase, and also genes involved in glutamatergic synaptic transmission, glutamate  
209 receptor signaling pathway, and sensory organ development were all

210 downregulated in the M phase. Notably, all these neuronal signaling events have  
211 been implicated in the analgesia induced by morphine (Table 1), again supporting  
212 the notion that morphine can induce analgesia in the treated mice. Also, genes  
213 involved in cell projection morphogenesis were upregulated in the L phase, in line  
214 with the evidence that morphine can induce structural changes in mice during  
215 chronic exposure [33].

216

217 Together, our results suggest that even during short-term morphine exposure,  
218 complex crosstalks between genes involved in proinflammatory and anti-  
219 inflammatory pathways, neuronal signaling, and the chemokine system have  
220 already initiated in mouse striatum, which can contribute to analgesia and/or  
221 tolerance effects if exposure of the drug lasts longer.

222

### 223 **Immune and neuronal responses to heroin in mouse striatum**

224 ***Immune responses:*** Our results showed that distinct from morphine, many  
225 immune genes induced by heroin were downregulated in the L phase (Table 2),  
226 which included MyD88-dependent Toll-like receptor signaling pathway, microglial  
227 cell activation, T-helper 1 type immune response (Il4, Tlr6, Il27), positive regulation  
228 of I- $\kappa$ B kinase/NF- $\kappa$ B signaling, regulation of granulocyte chemotaxis, inflammatory  
229 response, and regulation of MAP kinase activity. Notably, all these pathways are  
230 known to be active in proinflammatory responses during chronic opioid exposure  
231 [6]. Therefore, downregulation of these pathways indicates that heroin induces

232 strong anti-inflammatory response and thus elicits strong analgesic effects in the  
233 mice.

234

235 **Neuronal responses:** Genes involved in neuronal activities, such as regulation of  
236 nervous system development and excitatory postsynaptic membrane potential (IE  
237 phase) and cation transmembrane transport (M phase) were upregulated by  
238 heroin, whereas genes involved in regulation of neuron death were downregulated  
239 (IE phase) (Table 2). These results also agree with previous findings that neuronal  
240 responses play active roles in opioid-related pain process [6].

241

242 Also, we noticed that genes involved in cell morphogenesis involved in neuron  
243 differentiation, positive regulation of axonogenesis, and regulation of synapse  
244 organization were upregulated among IE and L phases after heroin exposure.  
245 These results are supported by the previous evidence that drugs of abuse can  
246 induce changes in structural plasticity in animals during chronic exposure [43].

247

248 **Other key biological responses:** Our results also showed that heroin induced  
249 genes participating in other key biological processes involved in pain-related  
250 pathways, e.g., genes involved in protein autophosphorylation are upregulated in  
251 the IE phase. Since protein phosphorylation is known to play key roles in  
252 desensitization and implicated in opioid-induced hyperalgesia [22], our results  
253 suggest that these genes contribute to dependence induced by chronic use of  
254 heroin; this speculation is confirmed by our association analysis described below.

255

256 **Association of morphine- and heroin-induced DEGs with harmful effects of**  
257 **drugs of abuse**

258 In order to find out whether DEGs induced by either morphine or heroin are  
259 associated with various harmful effects linked to drugs of abuse, we conducted the  
260 association analysis between expression levels of morphine- or heroin-induced  
261 DEGs and twelve DA-related harmful effects including dependence, physical  
262 dependence, psychological dependence, pleasure, physical harm, social harm,  
263 health care cost, and conditioned place preference (See S3 Table and Methods  
264 for details).

265

266 Using this approach, we detected 44 morphine-induced DEGs and 61 heroin-  
267 induced DEGs significantly associated with dependence-related behaviors at the  
268 nominal level of significance ( $p < 0.05$ ) (S4 and S5 Tables). Among these  
269 dependence-associated DEGs, 9 were induced by both morphine and heroin, of  
270 which 6 were induced in the IE phase. These results can be searched in our  
271 database at <http://daportals.org>.

272

273 Next, we investigated whether the dependence-associated DEGs induced by  
274 either morphine or heroin were involved in the pain-related neuroimmune  
275 pathways mediated by opioids. As shown in Tables 1 and 2, we found that a  
276 significant number of the dependence-associated DEGs induced by the opioids  
277 were involved in the pain-related neuroimmune pathways. Moreover, some of



278 these genes could be induced by both morphine and heroin, e.g., Dapk1, Plekhf1,  
279 Pim3, and Dusp12 were upregulated by both morphine and heroin in the IE phase,  
280 and were associated with psychological dependence and physical dependence,  
281 respectively.

282

### 283 **Detection of potential transcription regulators that regulate the opioid-** 284 **induced dependence-associated DEGs**

285 In order to find out whether the dependence-associated DEGs induced by each  
286 opioid were co-regulated by any TFs or epigenetic factors, we performed the TF  
287 and epigenetic factor binding site enrichment test using the ENCODE ChIP-Seq  
288 significance tool [44]. Our analysis showed that 17 transcription regulators  
289 potentially modulated morphine-responsive dependence-associated DEGs (S6  
290 Table), while that 12 transcription regulators modulated heroin-responsive  
291 dependence-associated DEGs (S7 Table). More details about our results are  
292 described below.

293

### 294 **Transcription regulators detected after morphine exposure**

295 ***Known TFs associated with dependence and addiction:*** More than half of the  
296 TFs we detected regulating dependence-associated DEGs after morphine  
297 exposure are previously known to play important roles in drug dependence and  
298 addiction. For example, we found that MEF2A upregulated four DEGs which were  
299 associated with physical dependence in the M phase, while that MEF2C  
300 upregulated one DEG associated with dependence in the IE phase after morphine

301 exposure, agreeing with the evidence that MEF2 is crucial in inducing behavioral  
302 changes after exposure to drugs of abuse [7].

303

304 ***Novel TFs induced by morphine:*** Our results also showed a few novel TFs  
305 activated by morphine. In order to quantify the magnitude of the effects the  
306 detected transcription regulators on the dependence-related behaviors induced by  
307 the opioids, we developed a scoring metric, called dependence score, based on  
308 the total fold changes of the dependence-associated DEGs co-regulated by each  
309 regulator (see details in Methods). Using this approach, we found that E2f6, which  
310 potentially regulated 13 DEGs associated with physical dependence after  
311 morphine exposure, had the highest dependence score of 17.93. Also, we  
312 detected ZBTB33 and ZKSCAN1 associated with physical dependence having  
313 high dependence scores (11 and 6.8, respectively) after morphine exposure. In  
314 particular, ZBTB33 encodes a transcriptional regulator Kaiso which can promote  
315 histone deacetylation and decrease expression levels of its target genes [45],  
316 consistent with our results showing that ZBTB33 downregulates 8 genes in the M  
317 phase. Also, Zkscan1 encodes a member of the Kruppel C2H2-type zinc-finger  
318 family of proteins, which has been implicated in regulating the expression of GABA  
319 type-A receptors in the brain [46].

320

321 ***Epigenetic factors:*** Our results showed that about half (8 out of 17) of the  
322 detected transcription regulators after morphine exposure were epigenetic factors  
323 (S6 Table). Literature search (S8 Table) suggests that these factors including

324 HDAC8 (encoding histone deacetylase 8) and HDAC6 (encoding histone  
325 deacetylase 6) play important roles in histone acetylation, histone methylation,  
326 DNA methylation, and chromatin remodeling [45, 47-52], in line with the previous  
327 evidence that all these epigenetic events have been implicated in the  
328 neurobiological responses to drugs of abuse in the brain [7]. Notably, among all  
329 the epigenetic factors, SAP30 which encodes a component of the histone  
330 deacetylase complex had the highest dependence score of 15.49 and can  
331 potentially co-regulate 11 morphine-responsive DEGs associated with physical  
332 dependence.

333

#### 334 **Transcription regulators detected after heroin exposure**

335 ***Known TFs associated with dependence and addiction:*** DEGs upregulated by  
336 EGR1 and CREB1 were associated with psychological dependence in the IE  
337 phase after administration of heroin, consistent with the fact that both EGR1 and  
338 CREB are key TFs which regulate genes involved in dependence-related  
339 behavioral responses during exposure of opioids as well as other drugs of abuse  
340 [5, 7]. Moreover, our results showed that Polr2a (encoding the largest subunit of  
341 RNA polymerase II), EGR1, and CREB1 were associated with social and physical  
342 harm with the highest scores ( $> 20$ ), suggesting that these TFs play key roles in  
343 the biological mechanism that underlies the higher social and physical harm  
344 caused by heroin compared to other drugs of abuse [4].

345

346 **Novel TFs induced by heroin:** We found that E2F6 (which showed the highest  
347 dependence score in morphine) also had the highest dependence score of 6.52,  
348 potentially regulating four DEGs associated with psychological dependence after  
349 exposure to heroin.

350

351 **Epigenetic regulators:** Similar to morphine, more than 40% of the detected  
352 transcription regulators were epigenetic factors after heroin exposure (S7 Table).  
353 All these factors have been known to play major roles in histone and DNA  
354 methylation, and chromatin remodeling methylation [50-53]. Notably, 3 epigenetic  
355 factors CTCF, EZH2, and SUZ12 were identified during both morphine and heroin  
356 exposure.

357

358 Taken together, our results suggest that distinct transcriptional regulatory  
359 mechanisms are responsive to exposure of morphine and heroin in mouse striatum,  
360 and that epigenetic regulation plays major roles after exposure to both opioids.  
361 Further investigation is needed to elucidate the roles of the novel TFs (e.g., E2F6)  
362 with high dependence scores after exposure of either morphine or heroin.

363

364 **Finding small compounds which can target the DEGs and the dependence-**  
365 **associated transcription regulators induced by the opioids**

366 To facilitate development of therapeutic interventions for treating morphine or  
367 heroin dependence, we developed a strategy which allowed us to identify small  
368 compounds that can target the opioid-induced dependence-associated DEGs and

369 their potential transcription regulators (see details in Methods). Our results are  
 370 shown in S9 and S10 Tables for morphine and heroin, respectively. Among all the  
 371 small compounds we identified, we found that Calmidazolium could target 8  
 372 morphine-induced dependence-associated DEGs (S9A Table), and that  
 373 Securinine could target E2F6 which had the highest dependence score after  
 374 morphine exposure (Table 3). Also, we identified that Phenacetin and Buspirone  
 375 could target 11 and 4 heroin-induced dependence-associated DEGs, respectively  
 376 (Table 4, S1 Fig), and that Meclofenoxate could target E2F6 which had the highest  
 377 dependence score also after heroin exposure (S10B Table).

378

379

380 **Table 3: Small compounds negatively correlated with the potential**  
 381 **transcription regulators after morphine administration.** All of the  
 382 abbreviations used in this table can be found in the legend of Table 1.

383

| Compound       | Transcription Regulators | Fold Change | Phase  | Associated Harmful Effects |
|----------------|--------------------------|-------------|--------|----------------------------|
| Benserazide    | TAF1                     | 2.9         | Up-IE  | Dep, pleasure              |
|                | MEF2A                    | 5.34        | Up-M   | Phys dep                   |
|                | ZKSCAN1                  | -6.81       | Down-M | Phys dep                   |
| Piperacetazine | SUZ12                    | 1.2         | Up-IE  | Dep                        |
|                | ZKSCAN1                  | -6.81       | Down-M | Phys dep                   |
| Securinine     | MEF2C                    | 1.7         | Up-IE  | Dep                        |
|                | BRF2                     | 1.39        | Up-M   | Phys dep                   |
|                | E2F6                     | -17.93      | Down-M | Phys dep                   |
| Isocorydine    | MEF2A                    | 5.34        | Up-M   | Phys dep                   |
| Gabapentin     | CTCF                     | 2.97        | Up-IE  | Chronic, dep, phys harm    |
|                | MEF2A                    | 5.34        | Up-M   | Phys dep                   |
|                | HDAC6                    | -4.84       | Down-M | Acute, phys dep            |

384

385 **Table 4: Small compounds negatively correlated with dependence-**  
 386 **associated DEGs after heroin administration.** All of the abbreviations used in  
 387 this table can be found in the legend of Table 1.

388

| Compound     | DEGs    | Fold Change | Phase   | Harmful Effects Associated with DEGs                 |
|--------------|---------|-------------|---------|------------------------------------------------------|
| Prilocaine   | DAPK1   | 1.63        | Up-IE   | Acute, intox, psycho dep                             |
|              | ACE     | 1.34        | Up-IE   | Acute, dep, HCC, phys dep, phys harm, soc            |
|              | CEP350  | 1.29        | Up-IE   | Dep, HCC, soc harm                                   |
|              | FAAH    | -1.42       | Down-IE | Acute, dep, phys harm, pleasure, soc harm, soc       |
|              | MPDU1   | -1.39       | Down-L  | Dep, HCC, phys dep, phys harm, psycho dep            |
| Phenacetin   | PLEKHF1 | 1.64        | Up-IE   | Psycho dep                                           |
|              | RPL7L1  | 1.56        | Up-IE   | Dep, HCC, phys dep, phys harm, soc harm, soc         |
|              | EXTL1   | 1.24        | Up-IE   | Dep, soc harm, soc                                   |
|              | SPON2   | 1.23        | Up-M    | Acute, dep, HCC, phys dep                            |
|              | TMTC4   | 1.19        | Up-M    | Dep, HCC, phys dep, phys harm                        |
|              | PCSK9   | 1.52        | Up-L    | Chronic, CPP, pleasure, psycho dep                   |
|              | FBRSL1  | -1.17       | Down-IE | Psycho dep                                           |
|              | ACSL4   | -1.34       | Down-M  | CPP, dep, HCC, phys dep                              |
|              | FEM1C   | -1.32       | Down-M  | Hcc, phys dep, soc harm                              |
|              | TOR3A   | -1.21       | Down-M  | Acute, dep, HCC, phys dep, phys harm, soc harm, soc  |
| Procyclidine | KLF2    | 2.31        | Up-IE   | CPP, dep, HCC, phys dep, phys harm                   |
|              | FEM1C   | -1.32       | Down-M  | Hcc, phys dep, soc harm                              |
| Spiradoline  | PLEKHF1 | 1.64        | Up-IE   | Psycho dep                                           |
|              | KIF23   | 1.36        | Up-IE   | Dep, HCC, phys harm, soc harm, soc                   |
|              | CEP350  | 1.29        | Up-IE   | Dep, HCC, soc harm                                   |
|              | PTBP3   | -1.19       | Down-L  | Chronic, CPP, intox, phys dep, phys harm, psycho dep |
| Buspirone    | NCS1    | 1.34        | Up-IE   | Dep, HCC, soc harm                                   |
|              | TBC1D2B | 1.31        | Up-IE   | Dep, HCC, phys dep, phys harm, soc harm, soc         |
|              | SLC35D1 | -1.29       | Down-M  | Acute, phys dep                                      |
|              | TOR3A   | -1.21       | Down-M  | Acute, dep, HCC, phys dep, phys harm, soc harm, soc  |

389

390

391

392

393

## 394 **Discussion**

395 Many studies have been conducted which intend to delineate pain-related  
396 pathways induced by opioids. However, much remains to be known about the  
397 molecular connection between these opioid-mediated pain pathways and those  
398 playing key roles in drug dependence and addiction. Dissecting these pathways  
399 can facilitate identification of candidate targets for developing effective therapeutic  
400 interventions which ideally can target opioid tolerance and dependence while  
401 preserving opioid analgesic effect.

402

403 In this study, we developed a computational strategy to identify candidate  
404 dependence-associated DEGs induced by either morphine or heroin, as well as to  
405 find small compounds which could target these genes for treating dependence of  
406 the opioids. Using this strategy, we analyzed a time-course gene expression  
407 microarray data set generated previously to investigate gene expression patterns  
408 responsive to various drugs of abuse in mouse striatum [24]. In particular, we first  
409 employed a local regression technique to detect genes differentially expressed  
410 over 8 hours of time in mouse striatum after either morphine or heroin exposure.  
411 Then, we performed correlation analysis to identify morphine or heroin-induced  
412 DEGs which were associated with twelve harmful effects including dependence  
413 commonly linked to drugs of abuse. Furthermore, we detected potential  
414 transcription regulators including TFs and epigenetic factors that regulated the  
415 dependence-associated DEGs using an ENCODE enrichment tool. Finally, to  
416 facilitate the identification of candidate targets and development of effective

417 therapy for morphine and heroin-induced dependence, we identified small  
418 compounds which could potentially target against some of the detected  
419 dependence-associated DEGs and transcription regulators.

420

421 Using the approach described above, we found that a significant number of the  
422 DEGs responsive to either morphine or heroin in mouse striatum were involved in  
423 the neuroimmune signaling pathways, which are typically activated in the pain-  
424 related pathways during chronic opioid use previously identified in other brain  
425 areas including periaqueductal gray, rostral ventromedial medulla, and dorsal root  
426 ganglia [6]. Using correlation analysis, we found that a considerable portion of the  
427 pain pathway-related DEGs, previously known to play active roles in opioid  
428 analgesia, tolerance, hyperalgesia, and allodynia, were associated with the  
429 harmful effects (such as dependence) linked to morphine and heroin as well as  
430 many other drugs of abuse, e.g., Irak1 (encoding interleukin-1 receptor-associated  
431 kinase 1) in the enriched Toll-like receptor signaling pathway (Table 1) induced by  
432 morphine was correlated with physical dependence at a nominal level of  
433 significance ( $p < 0.05$ ). Toll-like receptor signaling pathway has been known to  
434 play crucial roles in proinflammatory signaling and tolerance to opioid analgesia.  
435 We also noticed that some dependence-associated DEGs could be induced by  
436 both morphine and heroin, e.g., among DEGs upregulated in the IE phase, Dapk1  
437 and Plekhf1 were correlated with psychological dependence, while Dusp12 and  
438 Pim3 were associated with physical dependence after exposure to both morphine  
439 and heroin. It is unclear what roles these genes (induced by both opioids) play



440 when mice were first exposed to morphine, then switched to heroin later on, a  
441 scenario commonly seen among human drug abusers.

442

443 Despite the similarities in gene expression responses induced by both morphine  
444 and heroin in mouse striatum, differences between the two opioids are also  
445 obvious. For example, a large number of the DEGs involved in immune signaling  
446 were downregulated in the L phase after heroin exposure, as opposed to morphine  
447 exposure, suggesting that heroin elicited strong anti-inflammatory responses in the  
448 L phase and thus induced acute analgesic effects in the mice.

449

450 Among detected transcription regulators that potentially regulate the dependence-  
451 associated DEGs, MEF2A induced by morphine as well as EGR1 and CREB1 by  
452 heroin are known to play crucial roles in drug addiction. We also found that more  
453 than 40% of the detected transcription regulators are epigenetic factors after both  
454 morphine and heroin exposure, including HDAC8 and HDAC6 activated by  
455 morphine, which supports the previous notion that epigenetic factors are important  
456 for addiction. Furthermore, using the dependence score, a metric we developed  
457 for measuring the extent the detected transcription regulators affect the  
458 dependence-associated DEGs, we found that E2F6 has the highest dependence  
459 scores after exposure of both morphine and heroin.

460

461 In summary, our work here intent to elucidate molecular connections between the  
462 analgesic and tolerance-related pain pathways and harmful side effects of opioid

463 use during pain treatment. Despite the general belief that morphine is safe for  
464 managing patients with pain, our results suggest that morphine may induce  
465 tolerance to analgesia and dependence on the drug in the patients in the very early  
466 stage, which may increase the possibility of the same patients to abuse heroin  
467 thereafter, since heroin may further induce acute analgesic effects as suggested  
468 by our results. Moreover, because heroin can cause both structural and behavioral  
469 changes among patients, abusing heroin after morphine may lead to more potent  
470 dependence on the drugs among the patients.

471

472 Furthermore, we found several small compounds which could potentially target  
473 some of the dependence-associated DEGs and the detected transcription  
474 regulators induced by the opioids. In particular, we identified Securinine and  
475 Meclofenoxate which could target E2F6 in humans after exposure to morphine and  
476 heroin, respectively. These compounds can facilitate future development of  
477 effective therapeutic interventions which can target the adverse side effects of  
478 morphine and heroin, while preserving their analgesic effects.

479

480 The limitations of our work include the following. The gene expression microarray  
481 data we analyzed spanned only 8 hours after administration of morphine and  
482 heroin, which limited our ability to discover chronic effects of the drugs. In the future  
483 study, we intend to employ the same strategy to investigate long-term effects of  
484 morphine and heroin, and to compare them with the acute effects we discovered  
485 in this work. Also, biological validation is needed to verify our findings here.

486 Despite the limitations, we found that our results agree well with the previously  
487 known evidence about drug abuse and addiction, suggesting our findings are valid  
488 and worth further in-depth investigation. Moreover, our work provides insight into  
489 the molecular connections between the opioid-induced pain-related pathways and  
490 the adverse harmful effects associated with morphine and heroin. Understanding  
491 such connections may facilitate development of effective therapies which allow  
492 people to target dependence-associated genes and transcription regulators at an  
493 early stage of opioid use while preserving analgesic effects of opioids.

## 494 **Methods**

### 495 **Dataset**

496 The gene expression microarray data set we analyzed in this work was obtained  
497 from the NCBI Gene Expression Omnibus (GEO) database under the accession  
498 number [GEO:GSE15774]. This data set was generated from a previous work  
499 described in [24], in which, gene expression alterations in mouse striatum were  
500 investigated after the mice were treated by various drugs of abuse, including  
501 morphine, heroin, methamphetamine, cocaine, nicotine and alcohol. Detailed  
502 description of the data set can be found in [24]. Briefly, after a single dose of drug  
503 administration, gene expression was obtained from the mouse striatum at 1, 2, 4,  
504 8 hours afterwards. Meanwhile, samples from saline- and naïve-treated control  
505 group were collected at 0, 1, 2, 4, 8 hours as controls. There were three biological  
506 replicates for each drug group and each time point.

507

### 508 **Identification of genes differentially expressed over time in mouse striatum** 509 **after exposure of either morphine or heroin**

510 In order to identify genes differentially expressed over time in mouse striatum after  
511 administration of either morphine or heroin, we employed a local regression  
512 smoothing technique [54] to estimate the smoothed time course gene expression  
513 data for each opioid. The detailed description of the strategy can be found in [55].  
514 For each opioid, expression values of each gene (i.e., transcript) were available  
515 for 1, 2, 4, and 8 hours, and expression values for time point 0 for the  
516 corresponding genes from the naïve group were used to represent the control time

517 point (i.e., 0 hour) for each opioid. In particular, expression values for each gene  
518 over different time points were first fitted using a local polynomial quadratic (degree  
519 = 2) model with the bandwidth optimally estimated using a leave-one-out cross  
520 validation procedure [54]. To determine whether a gene is differentially expressed  
521 over time with respect to the control time point, we calculated the simultaneous 95%  
522 confidence intervals for the fitted (or expected) intensity values using a method  
523 due to Sun and Loader [56]. The p-values were adjusted using the Bonferroni  
524 correction to account for multiple hypothesis testing. We determined a gene as  
525 differentially expressed if its expression value at any time point  $T$  relative to the  
526 control time point satisfied: 1) adjusted p-value  $< 0.05$ , and 2) fold change  $\geq 1.2$ .

527

### 528 **Identification of temporal patterns for DEGs induced by either morphine or** 529 **heroin using cluster analysis**

530 In order to identify temporal patterns for DEGs responsive to either morphine or  
531 heroin exposure, we applied a k-means clustering algorithm proposed by Hartigan  
532 and Wong [57] to the temporal expression values of the DEGs. The Euclidean  
533 distance was used to measure dissimilarities between different genes. A thousand  
534 iterations were performed to find an optimal partition of  $K$  clusters where  $K$  is pre-  
535 assigned. To determine an optimal number of the clusters for the DEGs, we  
536 employed the average silhouette width (ASW) as described in [58], and when  $K =$   
537 6, ASW is the largest for the DEGs induced by both morphine and heroin.

538

## 539 **GO and KEGG pathway enrichment analysis**

540 We performed GO and KEGG pathway enrichment analysis to identify biological  
541 processes and pathways that were overrepresented among DEGs in each cluster  
542 after exposure of either morphine or heroin. We performed the enrichment analysis  
543 with the GOstats R software package [59], which finds enriched functional groups  
544 using the hypergeometric test with the aid of the functional terms in the GO and  
545 KEGG databases. GO terms and KEGG pathways were considered as significantly  
546 enriched if their p-values < 0.05.

547

## 548 **Association of morphine- and heroin-induced DEGs with harmful effects of** 549 **drugs of abuse**

550 Our association analysis aimed to determine whether morphine- and heroin-  
551 induced DEGs were associated with any harmful effects of drugs of abuse. The  
552 scores which assessed the magnitudes of the twelve harmful effects of various  
553 drugs of abuse were taken from Nutt et. al. [4] and can be found in S3 Table. In  
554 particular, the scores for the harmful effects encompassing three categories,  
555 including physical harm (overall, acute, chronic), dependence (pleasure,  
556 psychological, physical), social harm (overall, health-care costs), and conditioned  
557 place preference for the drugs including morphine, heroin, cocaine,  
558 methamphetamine, ethanol, and nicotine were used to calculate the association of  
559 each harmful effect and the DEGs induced by either morphine or heroin.  
560 Specifically, let  $S_i$  denote a vector of the scores for harmful effect  $i$  corresponding  
561 to drugs  $D$ , where  $D = [\text{morphine, heroin, cocaine, methamphetamine, ethanol,}$

562 and nicotine]. Let  $G_j$  denote a vector of expression values of gene  $G$  corresponding  
563 to drugs  $D$  at time point  $j$ ;  $G_j$  is a DEG induced by either morphine or heroin at time  
564 point  $j$ , but the gene is not required to be differentially induced by the other drugs  
565 at the same time point. The expression values of gene  $G$  for the drugs including  
566 cocaine, methamphetamine, ethanol, and nicotine were estimated for each drug  
567 by using the same local regression smoothing techniques as described above for  
568 morphine and heroin. Finally, we calculated the correlation between  $G_j$  and  $S_i$  using  
569 both the Pearson correlation and a quadratic polynomial regression; if the resulting  
570 p-value from any of the methods was less than 0.05,  $G_j$  was considered as  
571 significantly associated with  $S_i$ .

572

573 **Identification of human transcription and epigenetic factors that potentially**  
574 **regulate the dependence-associated DEGs induced by each opioid**

575 To identify potential transcription and epigenetic factors that regulate dependence-  
576 associated DEGs responsive to each opioid in mouse striatum, we employed the  
577 ENCODE ChIP-Seq significance tool [44] to identify human TFs and epigenetic  
578 factors whose binding sites were significantly enriched among the DEGs  
579 associated with dependence (i.e., dependence, psychological, and/or physical  
580 dependence) in each of the six identified clusters after either morphine or heroin  
581 exposure. The ENCODE ChIP-Seq significance tool calculates enrichment scores  
582 of the transcription regulators using the hypergeometric test, and the resulting p-  
583 values were corrected by an FDR procedure to account for multiple hypothesis  
584 testing. A 1000-base pair (bp) window upstream of the transcription start site (TSS)

585 and downstream of the transcription termination site (TTS) were considered for  
586 each DEG. A TF or an epigenetic factor was considered as significantly enriched  
587 if its FDR p-value < 0.05.

588

589 Furthermore, to facilitate ranking the significantly enriched TFs and epigenetic  
590 factors in terms of their impact on dependence, we developed a scoring metric  
591 called the 'dependence score' as follows. For each transcription regulator  $R$   
592 activated in a certain phase  $P$ , we assume that  $R$  regulates a number  $N$  of  
593 morphine or heroin-induced DEGs associated with a dependence-related harmful  
594 effect (such as dependence, psychological, or physical dependence) within phase  
595  $P$ . As shown in Figs 1 and 2, the IE, M, and L phases correspond to 0-2 hours, 2-  
596 4 hours, and 4-8 hours after exposure to either morphine or heroin. The  
597 'dependence score' for  $R$  in phase  $P$  was then defined as  $\sum_{i=1}^N FC_i$ , where  $FC_i$   
598 represents the maximum absolute fold change of the expression values of a DEG  
599  $G_i$  within phase  $P$ , relative to that of the control time point, and  $G_i$  is regulated by  
600  $R$ . The higher the dependence score, the more impact the transcription regulator  
601  $R$  can have on dependence.

602

603 Using a similar concept as the dependence score, we also assigned association  
604 scores to transcription regulator  $R$  if the DEGs it regulates were also associated  
605 with other harmful effects of drugs (as shown in S3 Table). Specifically, an  
606 association score between a transcription regulator  $R$  and a harmful effect  $H$  was



607 defined as the sum of the maximum absolute fold change of the DEGs regulated  
608 by  $R$  in phase  $P$  that were associated with  $H$ .

609

610 **Finding small molecular compounds to target the opioid-induced**  
611 **dependence-associated DEGs and the transcription regulators**

612 Gene expression patterns in cells can change during treatment by small-molecule  
613 drugs or compounds [60]. If a small compound has an opposite effect on  
614 transcription than opioids, the small compound has potential to reverse the gene  
615 signature induced by opioids and hence the subsequent harmful effects caused by  
616 opioids. With the availability of gene expression profiles of small molecular  
617 compounds, we were able to compare them with those of morphine and heroin,  
618 and identify small compounds with the potential for treating dependence and  
619 addiction induced by each opioid.

620

621 Specifically, we employed the following two-step strategy to find the small  
622 compounds:

623

624 **Finding DEGs induced by small compounds**

625 First, a commercial Illumina BaseSpace (former Nextbio™) software (Santa Clara,  
626 CA, USA, <http://www.nextbio.com>) were used to obtain the DEGs induced by small  
627 compounds in cells. In BaseSpace, most of the raw gene expression datasets  
628 involving perturbations by small compounds were obtained from the Gene  
629 Expression Omnibus (GEO) database (<http://www.ncbi.nlm.nih.gov/geo/>). Only  
630 genes with the p-values  $< 0.05$  and absolute fold changes  $> 1.2$  were considered

631 as DEGs induced by small compounds. To identify top compounds that have gene  
632 expression profiles most correlated with the dependence-associated DEG or the  
633 transcription regulators induced by morphine or heroin, we searched the gene  
634 expression profiles of small compounds stored in BaseSpace through BaseSpace  
635 integrated Pharmaco Atlas search. Then, the correlation between the DEGs  
636 induced by small compounds and the opioid-induced DEGs or transcription  
637 regulators was calculated as described below.

638

639 **Calculation of the correlation between the DEGs induced by small**  
640 **compounds and the opioid-induced DEGs or transcription regulators**

641 For each opioid-induced dependence-associated DEG, we used its maximum  
642 absolute fold change over the measured time points (i.e., 1, 2, 4, and 8 hours)  
643 (which was defined as the ratio of the highest absolute expression value of the  
644 gene relative to that at the control time point) to represent its fold change. For each  
645 transcription regulator, we used its dependence score to represent its fold change  
646 value.

647

648 The correlation between the DEGs induced by each small compound and the  
649 opioid-induced dependence-associated DEGs or transcription regulators was  
650 calculated using the BaseSpace software. This software provided a modified form  
651 of the rank-based enrichment statistics to compare the two sets of the DEGs [61,  
652 62]. BaseSpace pre-processed gene expression data with biomedical ontologies  
653 to enable comparison among heterogeneous datasets from different species. It

654 also used meta-analyses to provide consistent predictions from multiple instances  
655 of similar perturbations, e.g., genes expression profiles from different cell lines  
656 induced by the same compounds [63]. All analyses using the BaseSpace software  
657 were performed with the default parameters.

658

659 S1 Fig shows an example of the significant negative correlation between the (61)  
660 heroin-induced dependence-associated DEGs and the buspirone-induced DEGs  
661 ( $p$ -value = 0.0277). Four genes were regulated by both heroin and buspirone, but  
662 in opposite directions.

663

## 664 **References**

665 1. Pergolizzi J, Boger RH, Budd K, Dahan A, Erdine S, Hans G, et al. Opioids  
666 and the management of chronic severe pain in the elderly: consensus statement  
667 of an International Expert Panel with focus on the six clinically most often used  
668 World Health Organization Step III opioids (buprenorphine, fentanyl,  
669 hydromorphone, methadone, morphine, oxycodone). *Pain Pract.* 2008;8(4):287-  
670 313. Epub 2008/05/28. doi: 10.1111/j.1533-2500.2008.00204.x. PubMed PMID:  
671 18503626.

672 2. Brady KT, McCauley JL, Back SE. Prescription Opioid Misuse, Abuse, and  
673 Treatment in the United States: An Update. *Am J Psychiatry.* 2016;173(1):18-26.  
674 Epub 2015/09/05. doi: 10.1176/appi.ajp.2015.15020262. PubMed PMID:  
675 26337039; PubMed Central PMCID: PMC4782928.

- 676 3. Manchikanti L, Helm S, 2nd, Fellows B, Janata JW, Pampati V, Grider JS,  
677 et al. Opioid epidemic in the United States. *Pain Physician*. 2012;15(3 Suppl):ES9-  
678 38. Epub 2012/07/20. PubMed PMID: 22786464.
- 679 4. Nutt D, King LA, Saulsbury W, Blakemore C. Development of a rational  
680 scale to assess the harm of drugs of potential misuse. *Lancet*.  
681 2007;369(9566):1047-53. Epub 2007/03/27. doi: 10.1016/S0140-6736(07)60464-  
682 4. PubMed PMID: 17382831.
- 683 5. Ron D, Jurd R. The "ups and downs" of signaling cascades in addiction. *Sci*  
684 *STKE*. 2005;2005(309):re14. Epub 2005/11/10. doi: 10.1126/stke.3092005re14.  
685 PubMed PMID: 16278489.
- 686 6. Hutchinson MR, Shavit Y, Grace PM, Rice KC, Maier SF, Watkins LR.  
687 Exploring the neuroimmunopharmacology of opioids: an integrative review of  
688 mechanisms of central immune signaling and their implications for opioid  
689 analgesia. *Pharmacol Rev*. 2011;63(3):772-810. Epub 2011/07/15. doi:  
690 10.1124/pr.110.004135. PubMed PMID: 21752874; PubMed Central PMCID:  
691 PMC3141878.
- 692 7. Robison AJ, Nestler EJ. Transcriptional and epigenetic mechanisms of  
693 addiction. *Nat Rev Neurosci*. 2011;12(11):623-37. Epub 2011/10/13. doi:  
694 10.1038/nrn3111. PubMed PMID: 21989194; PubMed Central PMCID:  
695 PMC3272277.
- 696 8. Yager LM, Garcia AF, Wunsch AM, Ferguson SM. The ins and outs of the  
697 striatum: role in drug addiction. *Neuroscience*. 2015;301:529-41. Epub

- 698 2015/06/28. doi: 10.1016/j.neuroscience.2015.06.033. PubMed PMID: 26116518;  
699 PubMed Central PMCID: PMCPMC4523218.
- 700 9. Everitt BJ, Robbins TW. Neural systems of reinforcement for drug addiction:  
701 from actions to habits to compulsion. *Nat Neurosci.* 2005;8(11):1481-9. Epub  
702 2005/10/28. doi: 10.1038/nn1579. PubMed PMID: 16251991.
- 703 10. Badiani A, Belin D, Epstein D, Calu D, Shaham Y. Opiate versus  
704 psychostimulant addiction: the differences do matter. *Nat Rev Neurosci.*  
705 2011;12(11):685-700. Epub 2011/10/06. doi: 10.1038/nrn3104. PubMed PMID:  
706 21971065; PubMed Central PMCID: PMCPMC3721140.
- 707 11. Steidl S, Wasserman DI, Blaha CD, Yeomans JS. Opioid-induced rewards,  
708 locomotion, and dopamine activation: A proposed model for control by  
709 mesopontine and rostromedial tegmental neurons. *Neurosci Biobehav Rev.*  
710 2017;83:72-82. Epub 2017/09/28. doi: 10.1016/j.neubiorev.2017.09.022. PubMed  
711 PMID: 28951251; PubMed Central PMCID: PMCPMC5730464.
- 712 12. Gysling K, Wang RY. Morphine-induced activation of A10 dopamine  
713 neurons in the rat. *Brain Res.* 1983;277(1):119-27. Epub 1983/10/24. PubMed  
714 PMID: 6315137.
- 715 13. Johnson SW, North RA. Opioids excite dopamine neurons by  
716 hyperpolarization of local interneurons. *J Neurosci.* 1992;12(2):483-8. Epub  
717 1992/02/01. PubMed PMID: 1346804.
- 718 14. Klitenick MA, DeWitte P, Kalivas PW. Regulation of somatodendritic  
719 dopamine release in the ventral tegmental area by opioids and GABA: an in vivo

- 720 microdialysis study. *J Neurosci.* 1992;12(7):2623-32. Epub 1992/07/01. PubMed  
721 PMID: 1319478.
- 722 15. Margolis EB, Hjelmstad GO, Fujita W, Fields HL. Direct bidirectional mu-  
723 opioid control of midbrain dopamine neurons. *J Neurosci.* 2014;34(44):14707-16.  
724 Epub 2014/10/31. doi: 10.1523/JNEUROSCI.2144-14.2014. PubMed PMID:  
725 25355223; PubMed Central PMCID: PMC4212068.
- 726 16. Matthews RT, German DC. Electrophysiological evidence for excitation of  
727 rat ventral tegmental area dopamine neurons by morphine. *Neuroscience.*  
728 1984;11(3):617-25. Epub 1984/03/01. PubMed PMID: 6717805.
- 729 17. Russo SJ, Dietz DM, Dumitriu D, Morrison JH, Malenka RC, Nestler EJ. The  
730 addicted synapse: mechanisms of synaptic and structural plasticity in nucleus  
731 accumbens. *Trends Neurosci.* 2010;33(6):267-76. Epub 2010/03/09. doi:  
732 10.1016/j.tins.2010.02.002. PubMed PMID: 20207024; PubMed Central PMCID:  
733 PMC2891948.
- 734 18. Kosten TA, Kosten TR. Pharmacological blocking agents for treating  
735 substance abuse. *J Nerv Ment Dis.* 1991;179(10):583-92. Epub 1991/10/01.  
736 PubMed PMID: 1919542.
- 737 19. Soyka M, Mutschler J. Treatment-refractory substance use disorder: Focus  
738 on alcohol, opioids, and cocaine. *Prog Neuropsychopharmacol Biol Psychiatry.*  
739 2016;70:148-61. Epub 2015/11/19. doi: 10.1016/j.pnpbp.2015.11.003. PubMed  
740 PMID: 26577297.
- 741 20. Bailey CP, Husbands SM. Novel approaches for the treatment of  
742 psychostimulant and opioid abuse - focus on opioid receptor-based therapies.

- 743 Expert Opin Drug Discov. 2014;9(11):1333-44. Epub 2014/09/26. doi:  
744 10.1517/17460441.2014.964203. PubMed PMID: 25253272; PubMed Central  
745 PMCID: PMCPMC4587358.
- 746 21. Jacobsen JH, Hutchinson MR, Mustafa S. Drug addiction: targeting  
747 dynamic neuroimmune receptor interactions as a potential therapeutic strategy.  
748 Curr Opin Pharmacol. 2016;26:131-7. Epub 2015/12/15. doi:  
749 10.1016/j.coph.2015.10.010. PubMed PMID: 26657076.
- 750 22. Melik Parsadaniantz S, Rivat C, Rostene W, Reaux-Le Goazigo A. Opioid  
751 and chemokine receptor crosstalk: a promising target for pain therapy? Nat Rev  
752 Neurosci. 2015;16(2):69-78. Epub 2015/01/16. doi: 10.1038/nrn3858. PubMed  
753 PMID: 25588373.
- 754 23. Nutt DJ, Lingford-Hughes A, Erritzoe D, Stokes PR. The dopamine theory  
755 of addiction: 40 years of highs and lows. Nat Rev Neurosci. 2015;16(5):305-12.  
756 Epub 2015/04/16. doi: 10.1038/nrn3939. PubMed PMID: 25873042.
- 757 24. Piechota M, Korostynski M, Solecki W, Gieryk A, Slezak M, Bilecki W, et al.  
758 The dissection of transcriptional modules regulated by various drugs of abuse in  
759 the mouse striatum. Genome Biol. 2010;11(5):R48. Epub 2010/05/13. doi:  
760 10.1186/gb-2010-11-5-r48. PubMed PMID: 20459597; PubMed Central PMCID:  
761 PMCPMC2898085.
- 762 25. Tanga FY, Raghavendra V, DeLeo JA. Quantitative real-time RT-PCR  
763 assessment of spinal microglial and astrocytic activation markers in a rat model of  
764 neuropathic pain. Neurochem Int. 2004;45(2-3):397-407. Epub 2004/05/18. doi:  
765 10.1016/j.neuint.2003.06.002. PubMed PMID: 15145554.

- 766 26. Tanga FY, Nutile-McMenemy N, DeLeo JA. The CNS role of Toll-like  
767 receptor 4 in innate neuroimmunity and painful neuropathy. *Proc Natl Acad Sci U*  
768 *S A*. 2005;102(16):5856-61. Epub 2005/04/06. doi: 10.1073/pnas.0501634102.  
769 PubMed PMID: 15809417; PubMed Central PMCID: PMC556308.
- 770 27. Vabulas RM, Ahmad-Nejad P, Ghose S, Kirschning CJ, Issels RD, Wagner  
771 H. HSP70 as endogenous stimulus of the Toll/interleukin-1 receptor signal  
772 pathway. *J Biol Chem*. 2002;277(17):15107-12. Epub 2002/02/14. doi:  
773 10.1074/jbc.M111204200. PubMed PMID: 11842086.
- 774 28. Tsan MF, Gao B. Cytokine function of heat shock proteins. *Am J Physiol*  
775 *Cell Physiol*. 2004;286(4):C739-44. Epub 2004/03/06. doi:  
776 10.1152/ajpcell.00364.2003. PubMed PMID: 15001423.
- 777 29. Ndengele MM, Cuzzocrea S, Masini E, Vinci MC, Esposito E, Muscoli C, et  
778 al. Spinal ceramide modulates the development of morphine antinociceptive  
779 tolerance via peroxynitrite-mediated nitroxidative stress and neuroimmune  
780 activation. *J Pharmacol Exp Ther*. 2009;329(1):64-75. Epub 2008/11/27. doi:  
781 10.1124/jpet.108.146290. PubMed PMID: 19033555; PubMed Central PMCID:  
782 PMC2670603.
- 783 30. Buchanan MM, Hutchinson M, Watkins LR, Yin H. Toll-like receptor 4 in  
784 CNS pathologies. *J Neurochem*. 2010;114(1):13-27. Epub 2010/04/21. doi:  
785 10.1111/j.1471-4159.2010.06736.x. PubMed PMID: 20402965; PubMed Central  
786 PMCID: PMC2909662.



- 787 31. Perry VH, Hume DA, Gordon S. Immunohistochemical localization of  
788 macrophages and microglia in the adult and developing mouse brain.  
789 *Neuroscience*. 1985;15(2):313-26. Epub 1985/06/01. PubMed PMID: 3895031.
- 790 32. Grace PM, Hutchinson MR, Maier SF, Watkins LR. Pathological pain and  
791 the neuroimmune interface. *Nat Rev Immunol*. 2014;14(4):217-31. Epub  
792 2014/03/01. doi: 10.1038/nri3621. PubMed PMID: 24577438; PubMed Central  
793 PMCID: PMCPMC5525062.
- 794 33. Guegan T, Cebria JP, Maldonado R, Martin M. Morphine-induced locomotor  
795 sensitization produces structural plasticity in the mesocorticolimbic system  
796 dependent on CB1-R activity. *Addict Biol*. 2016;21(6):1113-26. Epub 2016/10/26.  
797 doi: 10.1111/adb.12281. PubMed PMID: 26179931.
- 798 34. Suarez-Roca H, Abdullah L, Zuniga J, Madison S, Maixner W. Multiphasic  
799 effect of morphine on the release of substance P from rat trigeminal nucleus slices.  
800 *Brain Res*. 1992;579(2):187-94. Epub 1992/05/08. PubMed PMID: 1378346.
- 801 35. Glaum SR, Miller RJ, Hammond DL. Inhibitory actions of delta 1-, delta 2-,  
802 and mu-opioid receptor agonists on excitatory transmission in lamina II neurons of  
803 adult rat spinal cord. *J Neurosci*. 1994;14(8):4965-71. Epub 1994/08/01. PubMed  
804 PMID: 8046463.
- 805 36. Grudt TJ, Williams JT. mu-Opioid agonists inhibit spinal trigeminal  
806 substantia gelatinosa neurons in guinea pig and rat. *J Neurosci*. 1994;14(3 Pt  
807 2):1646-54. Epub 1994/03/01. PubMed PMID: 8126561.
- 808 37. Stellwagen D, Beattie EC, Seo JY, Malenka RC. Differential regulation of  
809 AMPA receptor and GABA receptor trafficking by tumor necrosis factor-alpha. *J*

810 Neurosci. 2005;25(12):3219-28. Epub 2005/03/25. doi:  
811 10.1523/JNEUROSCI.4486-04.2005. PubMed PMID: 15788779.

812 38. Raghavendra V, Rutkowski MD, DeLeo JA. The role of spinal neuroimmune  
813 activation in morphine tolerance/hyperalgesia in neuropathic and sham-operated  
814 rats. J Neurosci. 2002;22(22):9980-9. Epub 2002/11/13. PubMed PMID:  
815 12427855.

816 39. Zhang N, Rogers TJ, Caterina M, Oppenheim JJ. Proinflammatory  
817 chemokines, such as C-C chemokine ligand 3, desensitize mu-opioid receptors on  
818 dorsal root ganglia neurons. J Immunol. 2004;173(1):594-9. Epub 2004/06/24.  
819 PubMed PMID: 15210821.

820 40. Zhang RX, Li A, Liu B, Wang L, Ren K, Zhang H, et al. IL-1ra alleviates  
821 inflammatory hyperalgesia through preventing phosphorylation of NMDA receptor  
822 NR-1 subunit in rats. Pain. 2008;135(3):232-9. Epub 2007/08/11. doi:  
823 10.1016/j.pain.2007.05.023. PubMed PMID: 17689191; PubMed Central PMCID:  
824 PMC2323207.

825 41. Iwasaki A, Medzhitov R. Toll-like receptor control of the adaptive immune  
826 responses. Nat Immunol. 2004;5(10):987-95. Epub 2004/09/30. doi:  
827 10.1038/ni1112. PubMed PMID: 15454922.

828 42. Hong J, Cho IH, Kwak KI, Suh EC, Seo J, Min HJ, et al. Microglial Toll-like  
829 receptor 2 contributes to kainic acid-induced glial activation and hippocampal  
830 neuronal cell death. J Biol Chem. 2010;285(50):39447-57. Epub 2010/10/07. doi:  
831 10.1074/jbc.M110.132522. PubMed PMID: 20923777; PubMed Central PMCID:  
832 PMC2998094.

- 833 43. Maze I, Covington HE, 3rd, Dietz DM, LaPlant Q, Renthal W, Russo SJ, et  
834 al. Essential role of the histone methyltransferase G9a in cocaine-induced  
835 plasticity. *Science*. 2010;327(5962):213-6. Epub 2010/01/09. doi:  
836 10.1126/science.1179438. PubMed PMID: 20056891; PubMed Central PMCID:  
837 PMCPMC2820240.
- 838 44. Auerbach RK, Chen B, Butte AJ. Relating genes to function: identifying  
839 enriched transcription factors using the ENCODE ChIP-Seq significance tool.  
840 *Bioinformatics*. 2013;29(15):1922-4. Epub 2013/06/05. doi:  
841 10.1093/bioinformatics/btt316. PubMed PMID: 23732275; PubMed Central  
842 PMCID: PMCPMC3712221.
- 843 45. Blattler A, Yao L, Wang Y, Ye Z, Jin VX, Farnham PJ. ZBTB33 binds  
844 unmethylated regions of the genome associated with actively expressed genes.  
845 *Epigenetics Chromatin*. 2013;6(1):13. Epub 2013/05/23. doi: 10.1186/1756-8935-  
846 6-13. PubMed PMID: 23693142; PubMed Central PMCID: PMCPMC3663758.
- 847 46. Mulligan MK, Wang X, Adler AL, Mozhui K, Lu L, Williams RW. Complex  
848 control of GABA(A) receptor subunit mRNA expression: variation, covariation, and  
849 genetic regulation. *PLoS One*. 2012;7(4):e34586. Epub 2012/04/17. doi:  
850 10.1371/journal.pone.0034586. PubMed PMID: 22506031; PubMed Central  
851 PMCID: PMCPMC3323555.
- 852 47. Godino A, Jayanthi S, Cadet JL. Epigenetic landscape of amphetamine and  
853 methamphetamine addiction in rodents. *Epigenetics*. 2015;10(7):574-80. Epub  
854 2015/05/30. doi: 10.1080/15592294.2015.1055441. PubMed PMID: 26023847;  
855 PubMed Central PMCID: PMCPMC4622560.

- 856 48. Popovic R, Martinez-Garcia E, Giannopoulou EG, Zhang Q, Zhang Q,  
857 Ezponda T, et al. Histone methyltransferase MMSET/NSD2 alters EZH2 binding  
858 and reprograms the myeloma epigenome through global and focal changes in  
859 H3K36 and H3K27 methylation. *PLoS Genet.* 2014;10(9):e1004566. Epub  
860 2014/09/05. doi: 10.1371/journal.pgen.1004566. PubMed PMID: 25188243;  
861 PubMed Central PMCID: PMC4154646.
- 862 49. Cao R, Zhang Y. SUZ12 is required for both the histone methyltransferase  
863 activity and the silencing function of the EED-EZH2 complex. *Mol Cell.*  
864 2004;15(1):57-67. Epub 2004/07/01. doi: 10.1016/j.molcel.2004.06.020. PubMed  
865 PMID: 15225548.
- 866 50. Schoofs T, Rohde C, Hebestreit K, Klein HU, Gollner S, Schulze I, et al.  
867 DNA methylation changes are a late event in acute promyelocytic leukemia and  
868 coincide with loss of transcription factor binding. *Blood.* 2013;121(1):178-87. Epub  
869 2012/11/16. doi: 10.1182/blood-2012-08-448860. PubMed PMID: 23152544.
- 870 51. Higgins GA, Allyn-Feuer A, Athey BD. Epigenomic mapping and effect sizes  
871 of noncoding variants associated with psychotropic drug response.  
872 *Pharmacogenomics.* 2015;16(14):1565-83. Epub 2015/09/05. doi:  
873 10.2217/pgs.15.105. PubMed PMID: 26340055.
- 874 52. Guelen L, Pagie L, Brassat E, Meuleman W, Faza MB, Talhout W, et al.  
875 Domain organization of human chromosomes revealed by mapping of nuclear  
876 lamina interactions. *Nature.* 2008;453(7197):948-51. Epub 2008/05/09. doi:  
877 10.1038/nature06947. PubMed PMID: 18463634.

- 878 53. Asensio-Juan E, Gallego C, Martinez-Balbas MA. The histone demethylase  
879 PHF8 is essential for cytoskeleton dynamics. *Nucleic Acids Res.*  
880 2012;40(19):9429-40. Epub 2012/08/02. doi: 10.1093/nar/gks716. PubMed PMID:  
881 22850744; PubMed Central PMCID: PMC3479184.
- 882 54. Loader C. Local regression and likelihood. New York: Springer; 1999. xiii,  
883 290 p. p.
- 884 55. Wu W, Dave NB, Yu G, Strollo PJ, Kovkarova-Naumovski E, Ryter SW, et  
885 al. Network analysis of temporal effects of intermittent and sustained hypoxia on  
886 rat lungs. *Physiol Genomics.* 2008;36(1):24-34. Epub 2008/10/02. doi:  
887 10.1152/physiolgenomics.00258.2007. PubMed PMID: 18826996; PubMed  
888 Central PMCID: PMC2604785.
- 889 56. Sun JY, Loader CR. Simultaneous Confidence Bands for Linear-  
890 Regression and Smoothing. *Ann Stat.* 1994;22(3):1328-45. doi: DOI  
891 10.1214/aos/1176325631. PubMed PMID: WOS:A1994QJ59900012.
- 892 57. Hartigan J, Wong M. A K-Means Clustering Algorithm. *Journal of the Royal*  
893 *Statistical Society Series C (Applied Statistics).* 1979;28(1):100-8.
- 894 58. Wu W, Bleecker E, Moore W, Busse WW, Castro M, Chung KF, et al.  
895 Unsupervised phenotyping of Severe Asthma Research Program participants  
896 using expanded lung data. *J Allergy Clin Immun.* 2014;133(5):1280-8. doi:  
897 10.1016/j.jaci.2013.11.042. PubMed PMID: WOS:000335450700007.
- 898 59. Falcon S, Gentleman R. Using GOstats to test gene lists for GO term  
899 association. *Bioinformatics.* 2007;23(2):257-8. doi: 10.1093/bioinformatics/btl567.  
900 PubMed PMID: WOS:000243992400060.

- 901 60. Iorio F, Rittman T, Ge H, Menden M, Saez-Rodriguez J. Transcriptional  
902 data: a new gateway to drug repositioning? *Drug discovery today*. 2013;18(7):350-  
903 7.
- 904 61. Lamb J, Crawford ED, Peck D, Modell JW, Blat IC, Wrobel MJ, et al. The  
905 Connectivity Map: using gene-expression signatures to connect small molecules,  
906 genes, and disease. *Science*. 2006;313(5795):1929-35. doi:  
907 10.1126/science.1132939. PubMed PMID: 17008526.
- 908 62. Lamb J. The Connectivity Map: a new tool for biomedical research. *Nature*  
909 *reviews Cancer*. 2007;7(1):54-60. doi: 10.1038/nrc2044. PubMed PMID:  
910 17186018.
- 911 63. Kupersmidt I, Su QJ, Grewal A, Sundaresh S, Halperin I, Flynn J, et al.  
912 Ontology-based meta-analysis of global collections of high-throughput public data.  
913 *PloS one*. 2010;5(9):e13066.
- 914

915 **Supporting information**

916 **S1 Fig: Significant negative correlation between the 61 heroin-induced**  
917 **dependence-associated DEGs and the buspirone-induced DEGs (p-value =**  
918 **0.0277).** Four genes were regulated by both heroin and buspirone, but in opposite  
919 directions.

920

921 **S1 Table: Significantly enriched GO terms and KEGG pathways induced by**  
922 **morphine in different phases and their association with harmful effects of**  
923 **drugs.** (A) Significantly enriched GO terms induced by morphine. (B)  
924 Significantly enriched KEGG pathways induced by morphine.

925

926 **S2 Table: Significantly enriched GO terms and KEGG pathways induced by**  
927 **heroin in different phases and their association with harmful effects of**  
928 **drugs.** (A) Significantly enriched GO terms induced by heroin. (B) Significantly  
929 enriched KEGG pathways induced by heroin.

930

931 **S3 Table: The scores of the harmful effects associated with drugs of abuse**  
932 **(adapted from Nutt, et. al., Lancet 2007; 369: 1047–53).**

933

934 **S4 Table: 44 dependence-associated DEGs induced after morphine**  
935 **exposure.**

936

937 **S5 Table: 61 dependence-associated DEGs induced after heroin exposure.**

938

939 **S6 Table: Significantly enriched transcription regulators and associated**  
940 **harmful effects after morphine exposure.**

941

942 **S7 Table: Significantly enriched transcription regulators and associated**  
943 **harmful effects after heroin exposure.**

944

945 **S8 Table: Supporting evidence of involvement of transcription regulators in**  
946 **drug dependence and addiction from literature.**

947

948 **S9 Table: Small compounds negatively correlated with dependence-**  
949 **associated DEGs and the potential transcription regulators after morphine**  
950 **administration.** (A) Small compounds negatively correlated with dependence-  
951 associated DEGs induced by morphine. (B) Small compounds negatively  
952 correlated with the transcription regulators induced by morphine.

953

954 **S10 Table: Small compounds negatively correlated with dependence-**  
955 **associated DEGs and the potential transcription regulators after heroin**  
956 **administration.** (A) Small compounds negatively correlated with dependence-  
957 associated DEGs induced by heroin. (B) Small compounds negatively correlated  
958 with the transcription regulators induced by heroin.

959



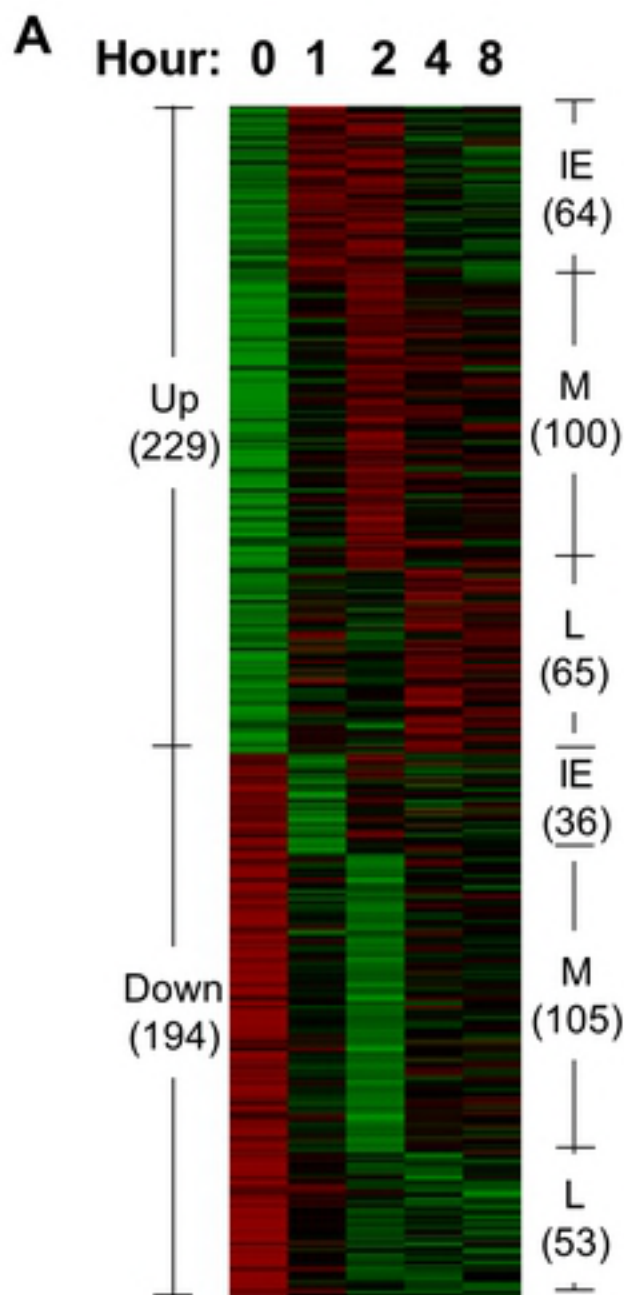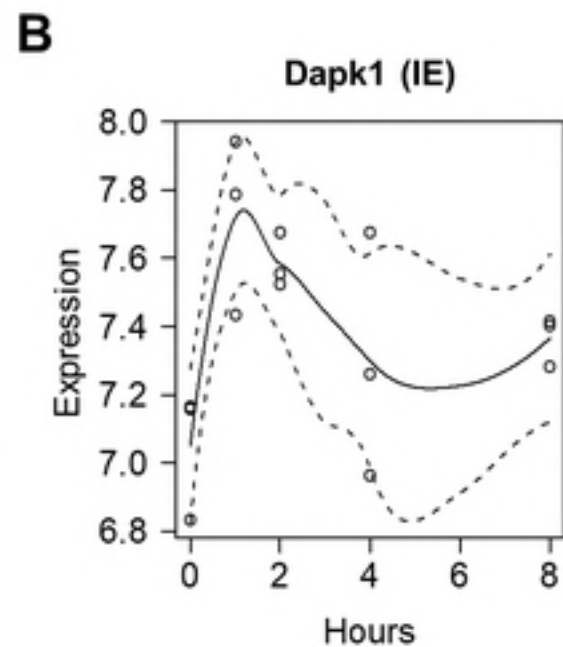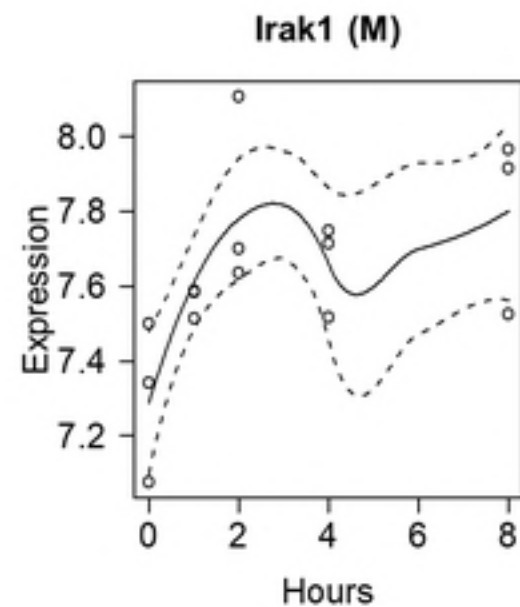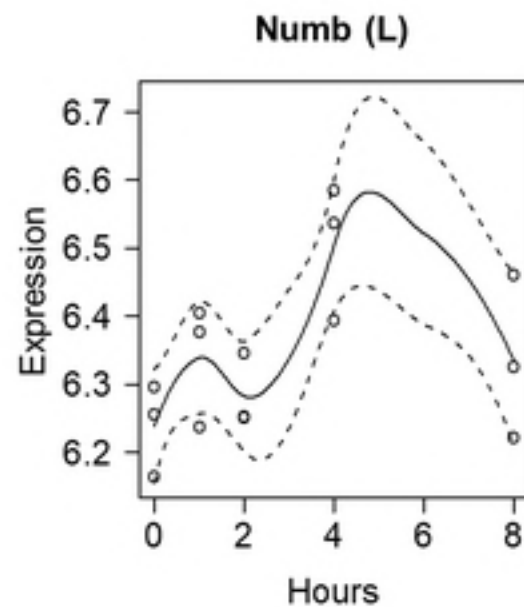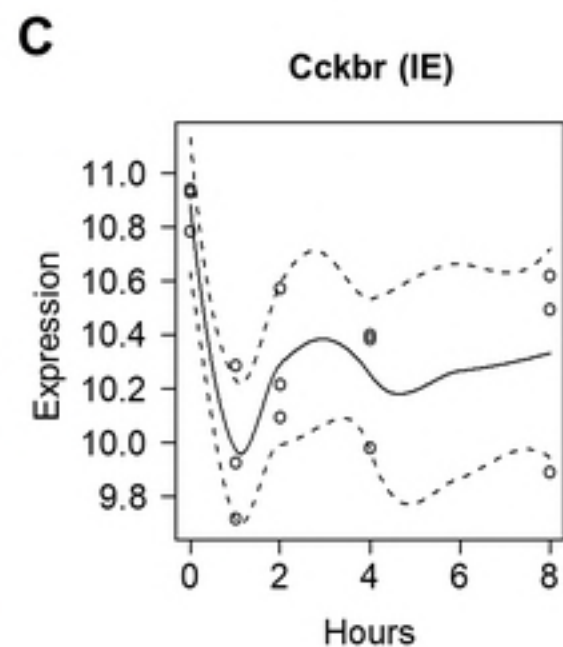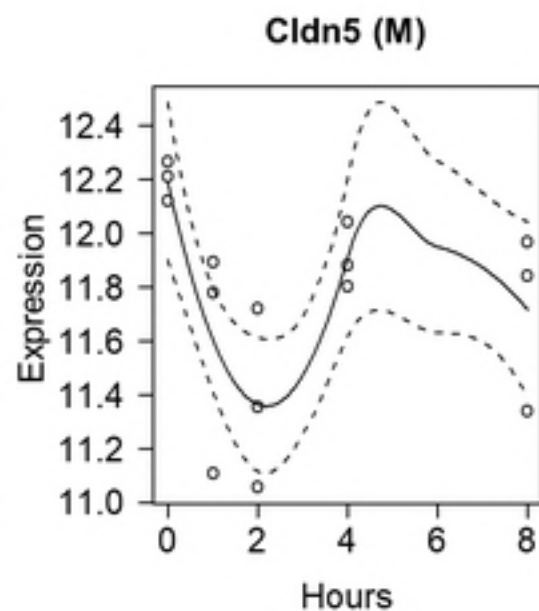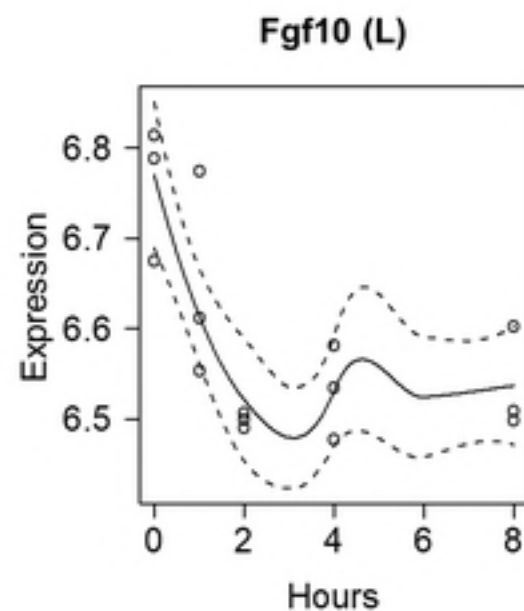

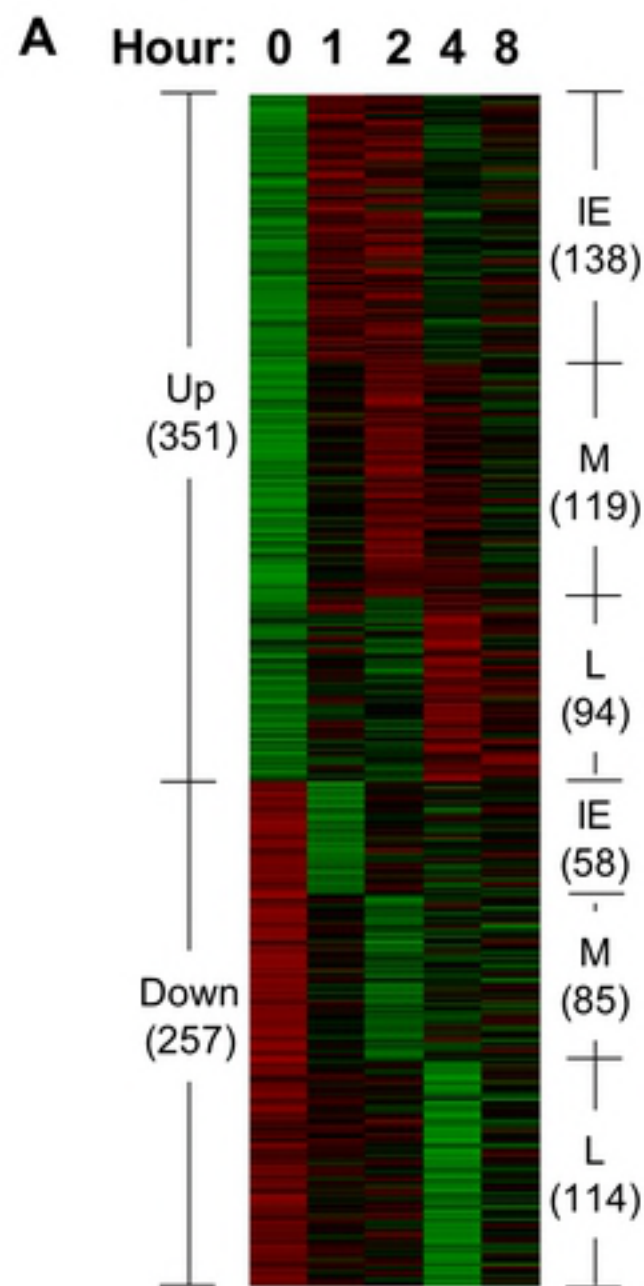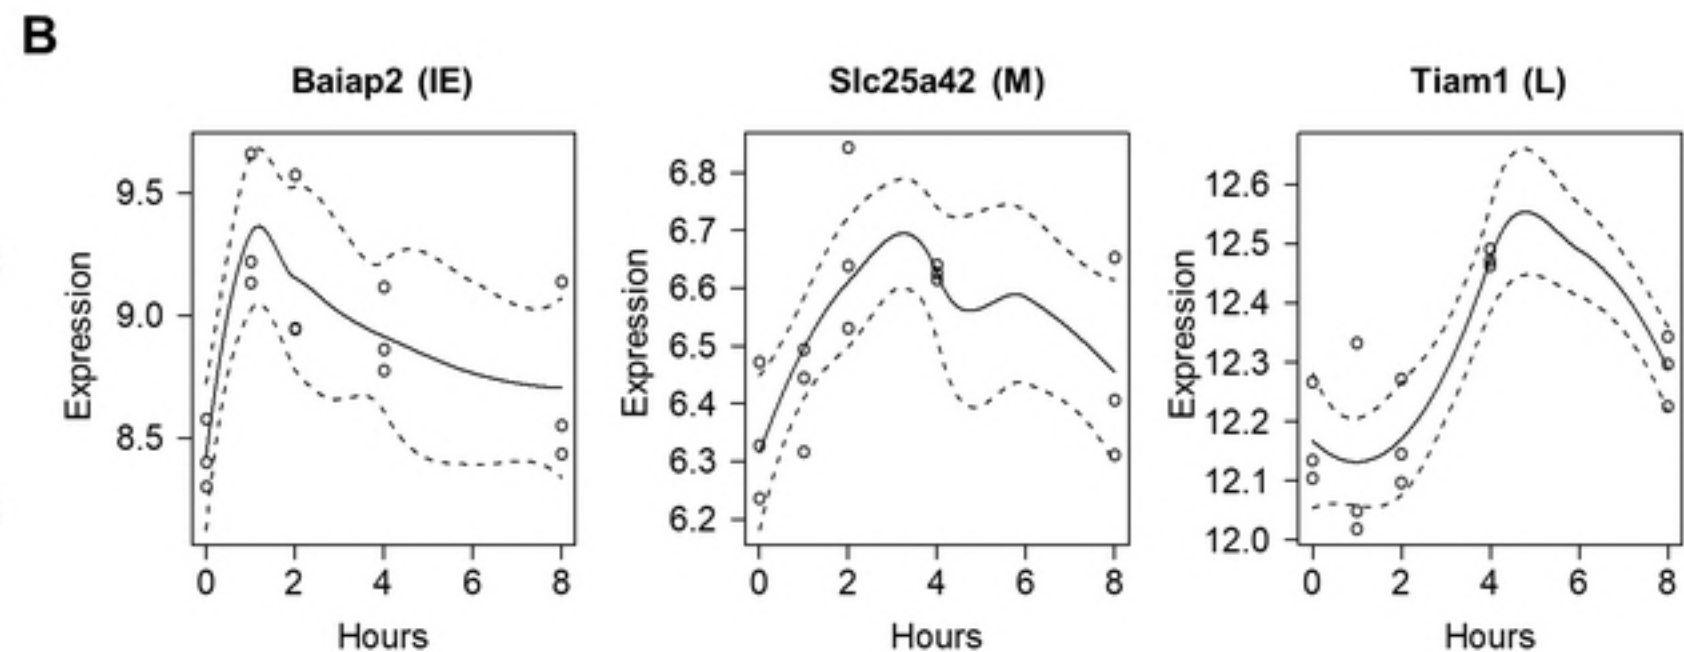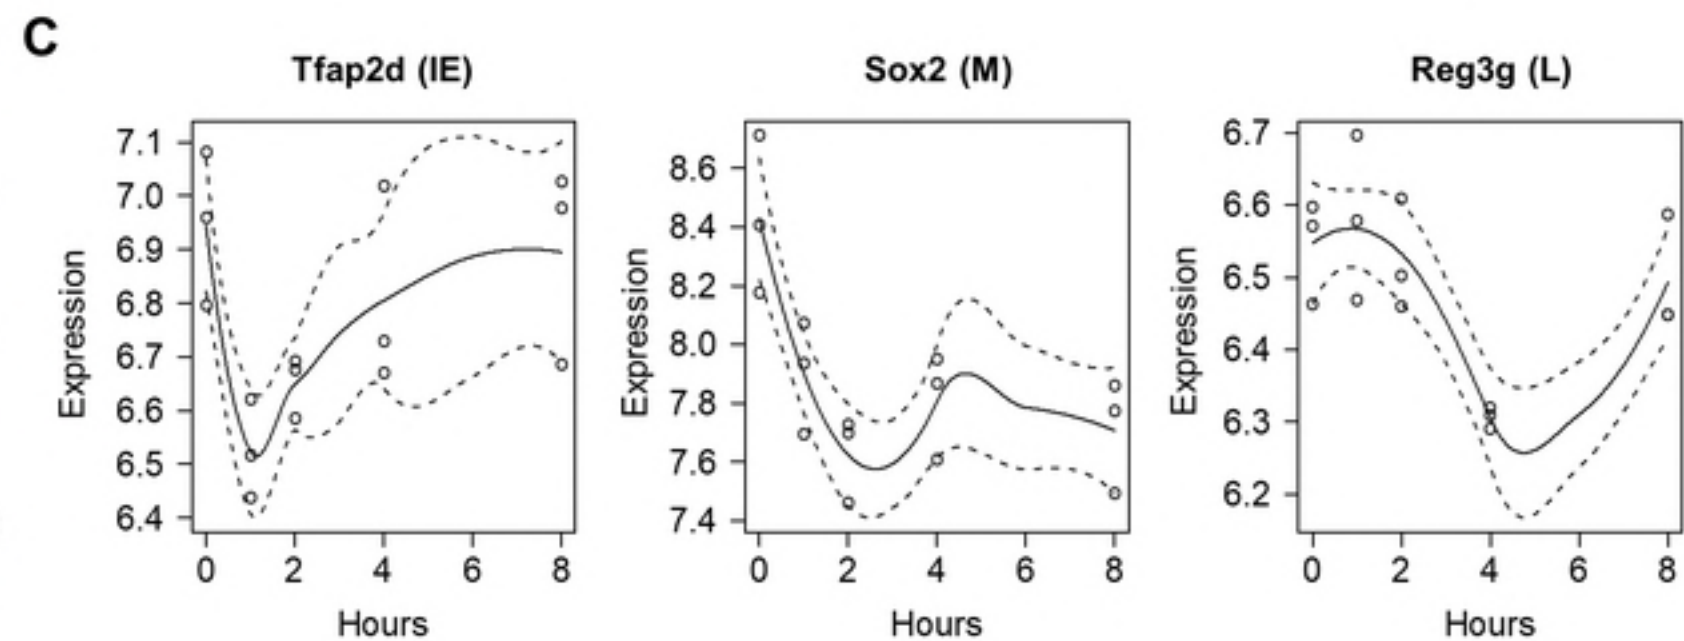

Source: https://www.biorxiv.org/content/10.1101/359075v1.full.pdf
